# Supplementary material
Source: publisher figshare collection journal article supplement (https://acs.figshare.com/ndownloader/files/3719488)
Supplement: Supplementary file 1 [file 3719488]

## Supporting Information

### **Robust Protein Hydrogels from Silkworm Silk**

*Zhao Li†, Zhaokun Zheng†, Yuhong Yang‡, Guangqiang Fang†, Jinrong Yao†,  
Zhengzhong Shao†, Xin Chen\*†*

†State Key Laboratory of Molecular Engineering of Polymers, Collaborative Innovation Center of Polymers and Polymer Composite Materials, Department of Macromolecular Science, Laboratory of Advanced Materials, Fudan University, Shanghai, 200433, People's Republic of China. E-mail: chenx@fudan.edu.cn

‡Research Centre for Analysis and Measurement, Fudan University, Shanghai 200433, People's Republic of China.

3 pages, 1 figure, and 2 tables

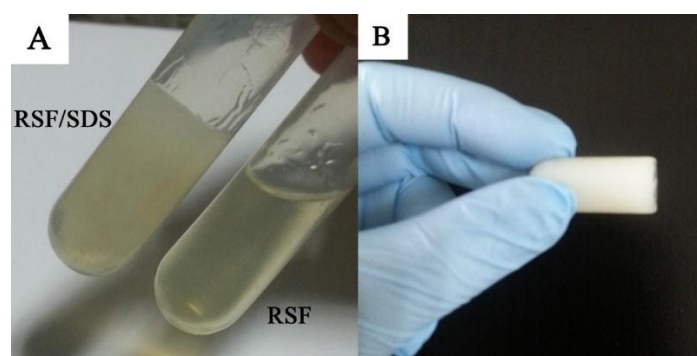

**Figure S1.** (A) Change of RSF/SDS mixed solution (left) and pure RSF solution (right) after heating in oven at 60 °C after a period of time, (B) final formed RSF/SDS hydrogel.

**Table S1.** Comparison of gelation time of RSF/SDS solutions

| Samples        | Gelation Time          |
|----------------|------------------------|
| 10RSF-SDS-05   | No gelation            |
| 10RSF-SDS-10   | 15 min                 |
| 10RSF-SDS-15   | Gelation during mixing |
| 12.5RSF-SDS-05 | No gelation            |
| 12.5RSF-SDS-10 | 2 h                    |
| 12.5RSF-SDS-15 | 50 min                 |
| 12.5RSF-SDS-20 | 30 min                 |
| 15RSF-SDS-05   | No gelation            |
| 15RSF-SDS-10   | 3 h                    |
| 15RSF-SDS-15   | 70 min                 |
| 15RSF-SDS-20   | 35 min                 |

**Table S2.** Comparison of gelation time of other RSF/surfactant solutions

| Samples         | Gelation Time |
|-----------------|---------------|
| 15RSF-SDBS-05   | No gelation   |
| 15RSF-SDBS-10   | 12 h          |
| 15RSF-SDBS-20   | 45 min        |
| 15RSF-Triton-10 | No gelation   |
| 15RSF-Triton-20 | 4 h           |
| 15RSF-Triton-40 | 2 h           |
| 15RSF-Triton-80 | 40 min        |
